# Supplementary material for: Co-existence of ferro- and antiferromagnetic interactions in a hexanuclear mixed-valence CoIII2MnII2MnIV2 cluster sustained by a multidentate Schiff base ligand
Source: Royal Society of Chemistry journal article supplement (doi:10.1039/c9dt02503k), 2019-01-01
Supplement: c9dt02503k1.pdf [file c9dt02503k1.pdf]

**Co-existence of ferro- and antiferromagnetic interactions in a hexanuclear mixed-valence  $\text{Co}^{\text{III}}_2\text{Mn}^{\text{II}}_2\text{Mn}^{\text{IV}}_2$  cluster sustained by a multidentate Schiff base ligand**

Oleh Stetsiuk,<sup>ab</sup> Valentyn Synytsia,<sup>b</sup> Svitlana R. Petrusenko,<sup>b</sup> Vladimir N. Kokozay,<sup>b</sup> Abdelkrim El-Ghayoury,<sup>a</sup> Joan Cano,<sup>\*c</sup> Francesc Lloret,<sup>c</sup> Miguel Julve,<sup>c</sup> Benoit Fleury,<sup>de</sup> and Narcis Avarvari<sup>\*a</sup>

**Supplementary Information**

**Table S1.** Bond Valence Sum calculations for complex **1**

| Ion | BVS  | Ro                    | B    |
|-----|------|-----------------------|------|
| Mn1 | 4.00 | 1.753                 | 0.37 |
| Mn2 | 2.05 | 2.133 (Cl); 1.765 (O) |      |
| Co1 | 3.08 | 1.75 (N); 1.637 (O)   |      |

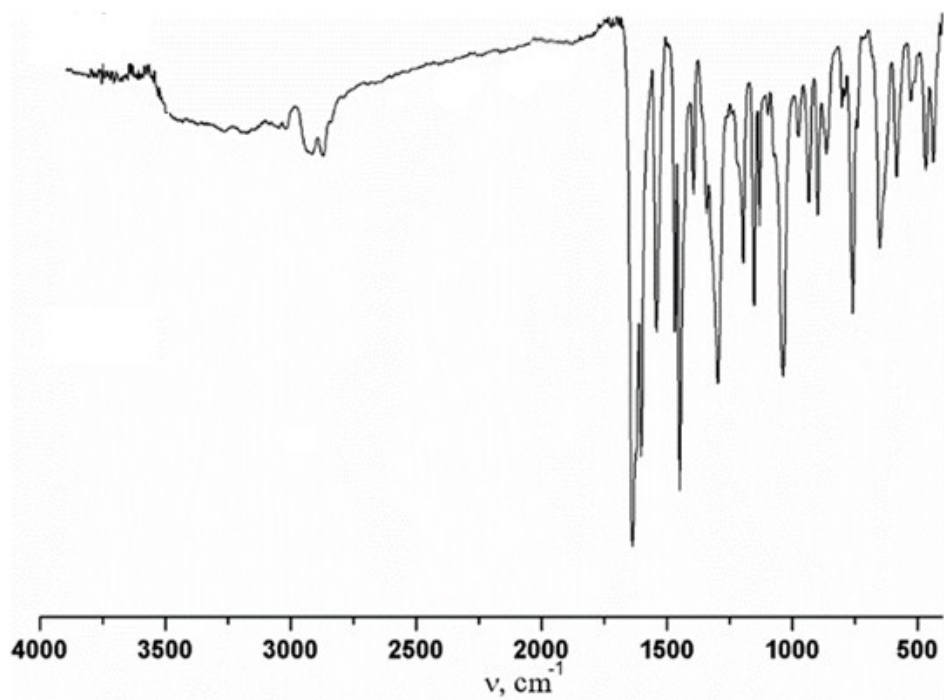

**Figure S1.** IR spectrum of complex **1**.

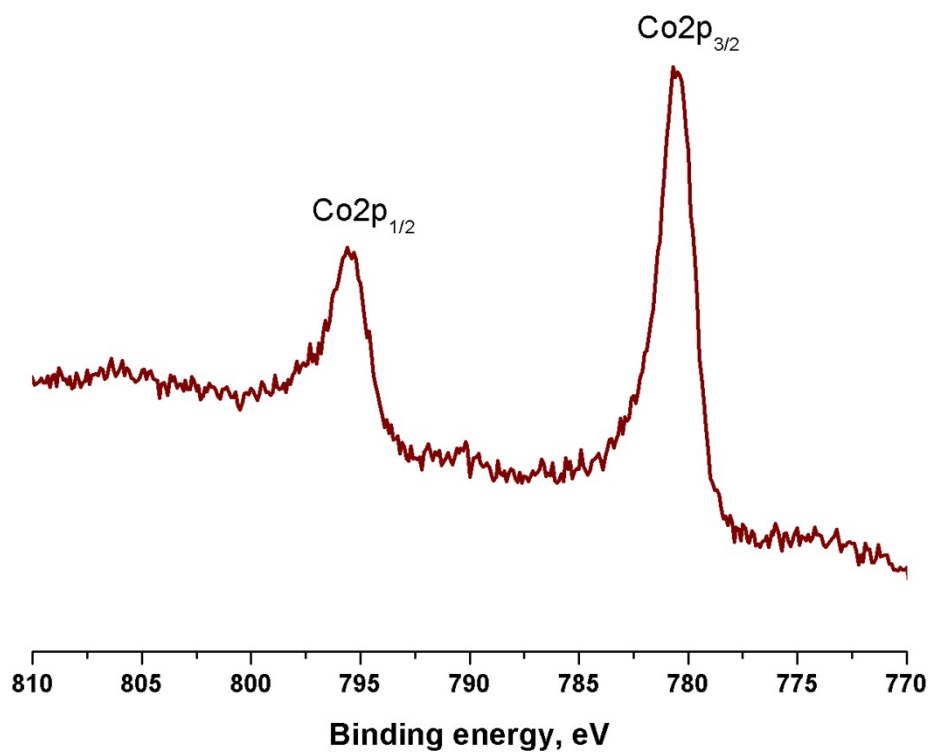

**Figure S2.** Co2p X-ray photoelectron spectrum of **1**.

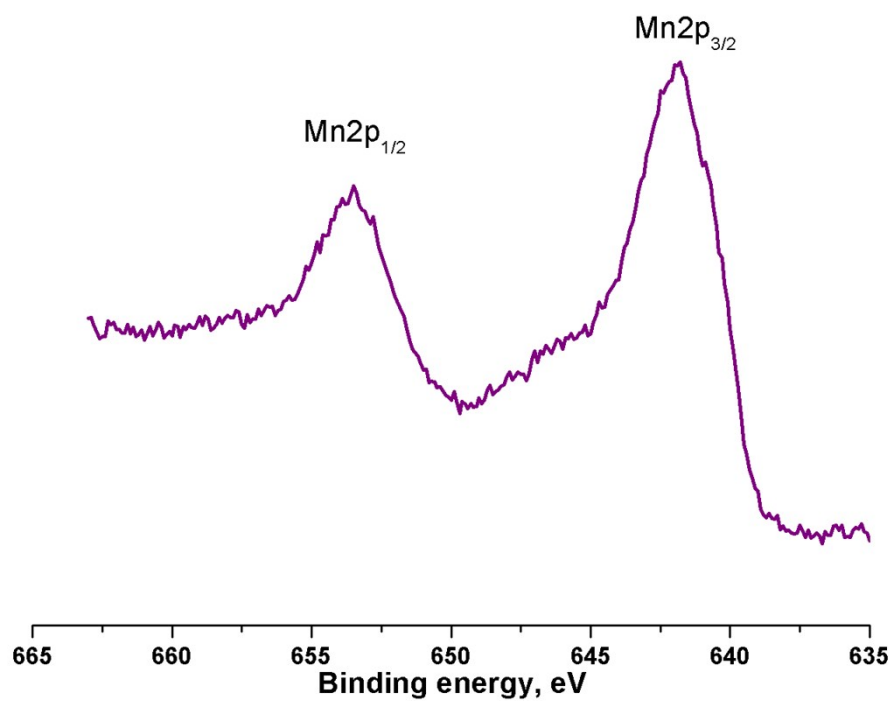

Figure S3. Mn2p X-ray photoelectron spectrum of 1.

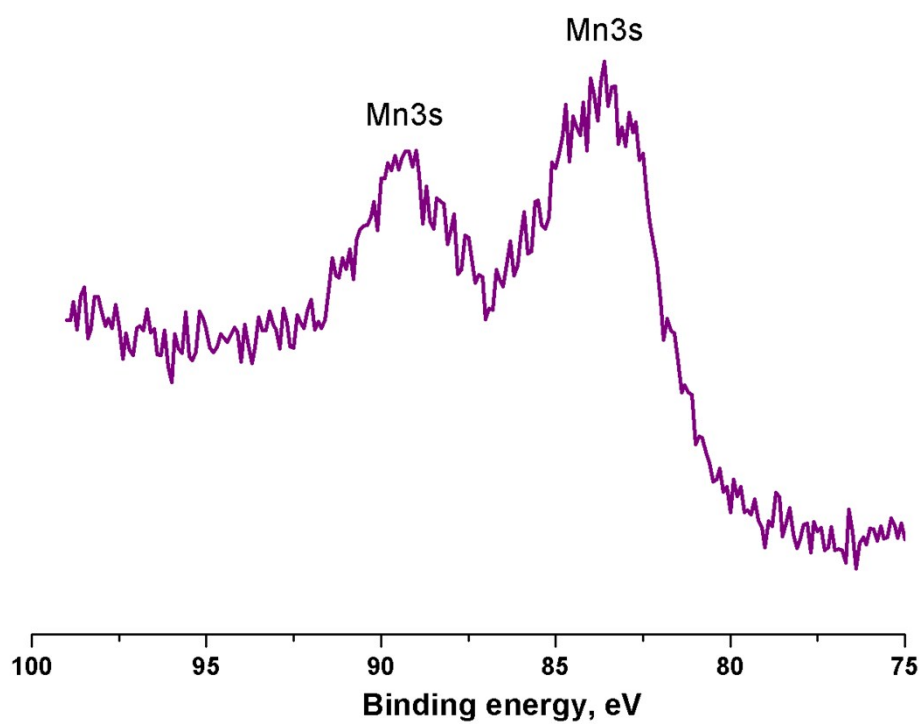

Figure S4. Mn3s X-ray photoelectron spectrum of 1.

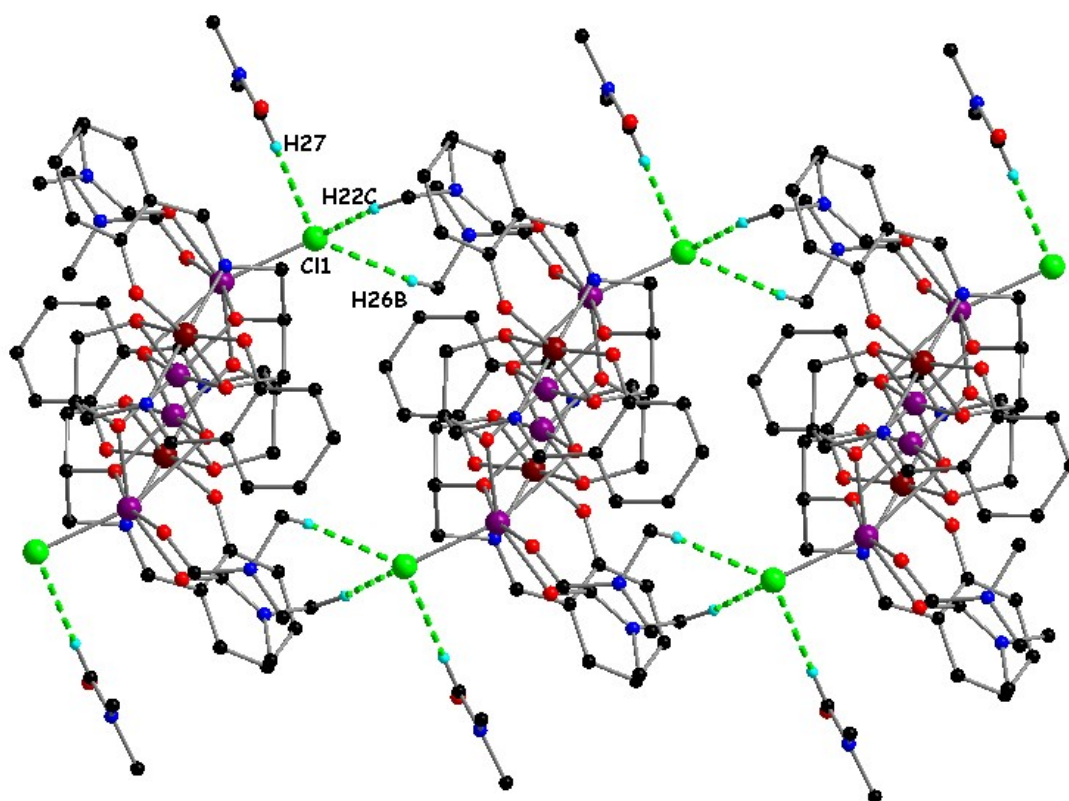

**Figure S5.** Hydrogen bonds (dashed green lines) in the crystal structure of **1**. Hydrogen atoms which are not involved in these interactions were omitted for clarity.

**Table S2.** Calculated spin configurations of the manganese atoms and their relative energies as a function of the different magnetic coupling parameters ( $J_i$ ) for **1** including the interaction between second neighbours according to Scheme 1. The spin configuration used as a reference is that with the maximum multiplicity ( $S = 8$ ) which is generated from the parallel alignment of all local spin moments. Only the centres with an inverted spin moment are noted.

| Spin conf            | S | $J_1$ | $J_2$ | $J_3$ | $j$ |
|----------------------|---|-------|-------|-------|-----|
| {1}                  | 5 | 6     | 9     | 9     | 0   |
| {2}                  | 3 | 0     | 9     | 9     | 15  |
| {1, 2}               | 0 | 6     | 0     | 18    | 15  |
| {1, 1 <sup>i</sup> } | 2 | 0     | 18    | 18    | 0   |
| {1, 2 <sup>i</sup> } | 0 | 6     | 18    | 0     | 15  |
